## Potential role of *Aphidius ervi* in protecting greenhouse bell pepper cultures from *Myzus persicae* aphids in India

---

Ambika Farhat & Ramila Dharmadhrt

Department of Biosciences, Jamia Millia Islamia, New Delhi, India

[rdharmadhrt@jmi.ac.in](mailto:rdharmadhrt@jmi.ac.in)

### *Short communication article*

*Note that this article has not yet been peer-reviewed*

### Abstract

Many aphids such as *Myzus persicae* are major agricultural pest against which sustainable solutions must be developed. In the present study, we evaluated the role of *Aphidius ervi* (Hymenoptera: Braconidae), an aphid parasitoid, to control *M. persicae* in bell pepper cultures in greenhouses. Parasitoids were released at one occasion in a greenhouse and *M. persicae* infested plants were followed before and after parasitoid introduction. We evaluated aphid numbers and parasitism rates at two different controlled temperatures (22°C and 25°C), and we measured diapause levels in released parasitoids. *Aphidius ervi* showed parasitism rates of 10.9±1.2% and 9.1±1.6%, at 21 and 25°C, respectively. The strain of parasitoids we used was not entering diapause under any temperature condition. Therefore, we suggest that *A. ervi* can be further investigated as a protection in greenhouse environments in India. More releases may be necessary to achieve a good protection.

### Introduction

Bell pepper (*Capsicum annuum* L.) is an important vegetable crop grown in India and other parts of the world, where sub-temperate climates are available. Among the many factors identified in limiting successful cultivation of bell peppers, the role of insect pests are extensively reported on this crop (Sanchez et al., 2011). *Myzus persicae* (Sulzer) (Aphididae: Hemiptera) is the most important of them, causing great damage to many crops worldwide. *Myzus persicae* is, for example, causing heavy economic losses in bell pepper in several states in India (Kaur et al., 2004). The problem in greenhouses is that such protected crops provide favorable microclimates for development of insect-pest populations, which limit successful crop production (Sood, 2010).

The aphid can also transmit several viral and fungal diseases in different hosts (Verma et al., 2018). *Myzus persicae* is, for some populations, extremely insecticide resistance (Verma et al., 2018), and consequently extremely difficult to control with pesticides. Therefore, biological control is becoming sustainable approach to manage this pest. Population growth of this aphid is restrained by many natural enemies under field conditions, particularly hymenopteran parasitoids (Starý, 1970; Verma et al., 2018). Augmentative release of hymenopteran parasitoids in greenhouses has been used in different parts of the world (Boivin et al., 2012). On pepper bell, *Aphelinus asychis* Walker, *Aphidius matricariae* Haliday, and *Aphidius ervi* (Haliday) have been identified to parasitize *M. persicae* (Gavkare et al., 2014).

However, little information is available on how these hymenopteran parasitoids respond to different temperatures in terms of parasitism efficiency, and if they express diapause in greenhouse conditions,

which would be detrimental to good aphid control. *Aphidius ervi* enters diapause in different parts of the world, such as in Canada or in Europe, but temperatures are colder than in India (Christiansen-Weniger and Hardie, 1999; Polgár et al., 1991; Tougeron et al., 2018a). Assessing diapause and temperature effects in parasitoids is important because they are very likely to be affected by high temperatures associated with climate-change, especially when conditions are already warm such as in sub-temperate areas of pepper bell growth, and in greenhouses (Ghosh and Ballal, 2017; Masry and El-Wakeil, 2020; Tougeron et al., 2019).

## Materials and methods

We surveyed 40 randomly selected bell pepper plants infested with *M. persicae* colonies in two private-own greenhouses (70m<sup>2</sup> each). One greenhouse was kept at 21°C and the other was kept at 25°C. No insecticide application was done in these greenhouses.

One observation was done on 8 weeks-old plants to count aphids, then parasitoids were released in both greenhouses from our laboratory culture, and one observation was done two weeks after release. Parasitoids were released by groups of 50 (males and females) on 10 random points in each greenhouse, close to the plants. Aphids were visually counted on each plant. Once mummies were formed, they were collected for each plant and kept in petri dishes. Parasitism rate was assessed as the number of mummies / the total number of aphids on the plant two weeks after parasitoid introduction. Mummies were kept until a new parasitoid emerged and diapause rates were evaluated following the protocol of Tougeron et al., (2020); we dissected non-emerged mummies and we classified the content either as a dead parasitoid or a diapausing parasitoid.

## Results

After parasitoid introduction, infestation by *Myzus persicae* decreased by 5.8% in the greenhouse at 21°C, and by 14.7% in the greenhouse at 25°C (Figure 1). Our results indicate that the control at 25°C could be better than at 21°C. However, error bars are overlapping by a lot suggesting that the differences are not major.

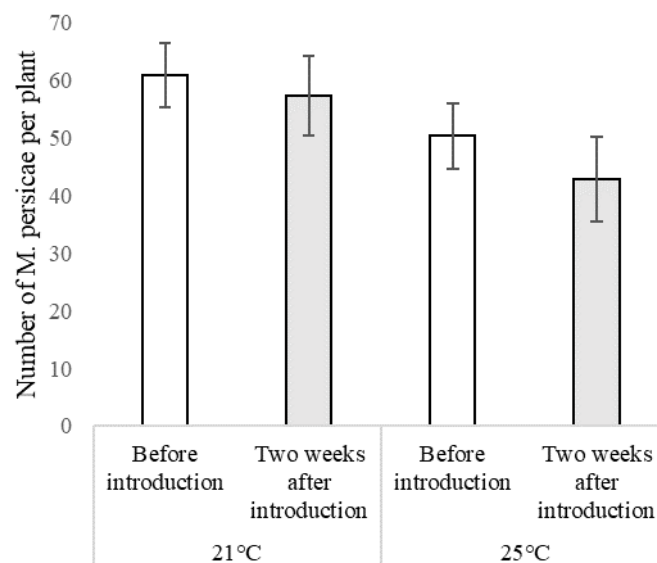

Figure 1: Decrease in mean abundance and standard error of *Myzus persicae* on 20 random plants per greenhouse (at 21°C or at 25°C) after *Aphidius ervi* parasitoid parasitoid release.

Parasitism rates were evaluated at  $10.9 \pm 1.2\%$  and  $9.1 \pm 1.6\%$ , at 21 and 25°C, respectively, in greenhouses two weeks after parasitoid release.

Finally, all parasitoids either emerged from their mummies or were found dead when performing the dissections, which indicates that no diapause was found in these released populations, under the temperature conditions we tested.

## Discussion

The present results are promising in terms of control of *M. persicae* under greenhouse conditions. In conjunction with earlier studies (Gavkare et al., 2014; Verma et al., 2018), finding that *A. ervi* can successfully parasitize *M. persicae* in greenhouses is an important piece of information to develop sustainable biocontrol strategies. Some authors that have worked on *A. ervi* also emitted the idea of manipulating sleep in insects in a biological control perspective (Tougeron and Abram, 2017), and we suggest it could be an interesting hypothesis to explore to better control aphids in greenhouses

We did not find major differences between the two temperature treatments. It is known that aphid parasitoids are sensitive to temperature fluctuations in terms of behaviour and physiology (Ismail et al., 2010; Sigsgaard, 2000), but probably temperatures were high enough in our experiments to provide excellent survival to released parasitoids. The parasitoid strain we used was from a population captured earlier in the fields and kept in laboratory environments. It should be noted, however, that many studies have found differences in *Aphidius ervi* parasitism efficiency and life-history traits depending on their origin (Tougeron et al., 2018b, very recently: Saeed et al., 2020).

Further studies are required to develop methods for mass rearing these parasitoids, to better study their behavior against different pest aphids, as well as to develop suitable release techniques for use in Indian greenhouses (Gavkare et al., 2014; Kumar et al., 2020, 2019).

## References

- Boivin, G., Hance, T., Brodeur, J., 2012. Aphid parasitoids in biological control. *Canadian Journal of Plant Science* 92, 1–12. <https://doi.org/10.4141/cjps2011-045>
- Christiansen-Weniger, P., Hardie, J., 1999. Environmental and physiological factors for diapause induction and termination in the aphid parasitoid, *Aphidius ervi* (Hymenoptera: Aphidiidae). *Journal of insect physiology* 45, 357–364.
- Gavkare, O., Kumar, S., Japoshvili, G., 2014. Effectiveness of native parasitoids of *Myzus persicae* in greenhouse environments in India. *Phytoparasitica* 42, 141–144.
- Ghosh, E., Ballal, C.R., 2017. Diapause induction and termination in Indian strains of *Trichogramma chilonis* (Hymenoptera: Trichogrammatidae). *Canadian Entomologist* 149, 607.
- Ismail, M., Vernon, P., Hance, T., van Baaren, J., 2010. Physiological costs of cold exposure on the parasitoid *Aphidius ervi*, without selection pressure and under constant or fluctuating temperatures. *BioControl* 55, 729–740. <https://doi.org/10.1007/s10526-010-9303-0>
- Kaur, S., Dhillon, T., Singh, P., Hundal, J., Singh, G., Singh, D., 2004. Protected cultivation of sweet pepper hybrids under net-house in Indian conditions, in: *Acta Horticulturae*. Presented at the VII International Symposium on Protected Cultivation in Mild Winter Climates: Production, Pest Management and Global Competition 659, pp. 515–521.
- Kumar, S., Kashyap, S., Soni, S., 2020. Performance of the parasitoid species *Aphelinus asychis* Walker (Hymenoptera: Aphelinidae), *Aphidius ervi* (Haliday) (Hymenoptera: Braconidae) and *Diaeretiella rapae* (McIntosh) (Hymenoptera: Braconidae), using *Myzus persicae* (Sulzer) (Hemiptera: Aphididae) as host. *Egyptian Journal of Biological Pest Control* 30, 1–9.

- Kumar, S., Kashyap, S., Soni, S., 2019. The foraging behaviour of *Aphelinus asychis* Walker (Hymenoptera: Aphelinidae) and *Aphidius ervi* (Haliday)(Hymenoptera: Braconidae) on *Myzus persicae* (Sulzer)(Hemiptera: Aphididae). *Phytoparasitica* 47, 351–360.
- Masry, S.H., El-Wakeil, N., 2020. Egg parasitoid production and their role in controlling insect pests, in: *Cottage Industry of Biocontrol Agents and Their Applications*. Springer, pp. 3–47.
- Polgár, L.A., Mackauer, M., Völkl, W., 1991. Diapause induction in two species of aphid parasitoids: the influence of aphid morph. *Journal of insect physiology* 37, 699–702.
- Saeed, M.M., Tougeron, K., Raza, A.B.M., Afzal, M., Aqueel, A., Le Goff, G.J., Renoz, F., Pirotte, J., Hance, T., 2020. Transgenerational phenotypic plasticity of diapause induction and related fitness cost in a commercial strain of the parasitoid *Aphidius ervi* Haliday. *Insect Science* 1744-7917.12794. <https://doi.org/10.1111/1744-7917.12794>
- Sanchez, J., La-Spina, M., Michelena, J., Lacasa, A., Hermoso de Mendoza, A., 2011. Ecology of the aphid pests of protected pepper crops and their parasitoids. *Biocontrol Science and Technology* 21, 171–188.
- Sigsgaard, L., 2000. The temperature-dependent duration of development and parasitism of three cereal aphid parasitoids, *Aphidius ervi*, *A. rhopalosiphii*, and *Praon volucre*. *Entomologia Experimentalis et Applicata* 95, 173–184.
- Sood, A., 2010. Integrated pest management under protected environment: principles and practices. *Agropedia* 29, 13–21.
- Starý, P., 1970. *Biology of aphid parasites*, Dr Junk Publishers. ed, Series Entomologica. The Hague.
- Tougeron, K., Abram, P.K., 2017. An ecological perspective on sleep disruption. *The American Naturalist* 190, E55–E66.
- Tougeron, K., Brodeur, J., Le Lann, C., Van Baaren, J., 2019. How climate change affects the seasonal ecology of insect parasitoids. *Ecol Entomol* 45, 167–181. <https://doi.org/10.1111/een.12792>
- Tougeron, K., Devogel, M., van Baaren, J., Le Lann, C., Hance, T., 2020. Trans-generational effects on diapause and life-history-traits of an aphid parasitoid. *Journal of Insect Physiology* 121, 104001. <https://doi.org/10.1016/j.jinsphys.2019.104001>
- Tougeron, K., Van Baaren, J., Le Lann, C., Brodeur, J., 2018a. Diapause expression in a Quebec population of the parasitoid *Aphidius ervi* (Hymenoptera: Braconidae). *The Canadian Entomologist* 151, 345–349.
- Tougeron, K., Van Baaren, J., Llopis, S., Ridel, A., Doyon, J., Brodeur, J., Le Lann, C., 2018b. Disentangling plasticity from local adaptation in diapause expression in parasitoid wasps from contrasting thermal environments: a reciprocal translocation experiment. *Biological Journal of the Linnean Society* 124, 756–764.
- Verma, S., Sharma, P., Chandel, R., Negi, S., 2018. Spatial distribution of green peach aphid, *Myzus persicae* Sulzer and its parasitoid, *Aphelinus asychis* Walker in bell pepper under polyhouse conditions.
